# Supplementary material for: Knowledge, Attitude and Practice of Adverse Drug Reaction Monitoring and Pharmacovigilance among Various Healthcare Professionals in India
Source: Preprints.org preprint supplement (doi:10.20944/preprints202008.0067.v1), 2020-08-03
Supplement: Supplementary file 2 [file supplementary]

**RESEARCH ARTICLE**

**Knowledge, Attitude and Practice of Adverse drug reaction monitoring and Pharmacovigilance among various Healthcare Professionals in India.**

**Amrita Kumari1*, Irfanul Haque2, Sarita Jangra Bhyan3, M. Sreelakshmi4, Nancy Goel5, Aashi jain6, Besty Thomas7, Kulsoom Hamid8, Rashi Chauhan9**

1. Pharm D Intern Student, Department of Pharmacy Practice, Teerthanker Mahaveer College of Pharmacy, TMU, Moradabad, Uttar Pradesh, India. Email: [amritakm2504@gmail.com](mailto:amritakm2504@gmail.com)
2. Head of Department, Department of Clinical Pharmacology Jaypee Hospital, Noida, Uttar Pradesh, India. Email: [irfaanpharma@gmail.com](mailto:irfaanpharma@gmail.com)
3. Internship Coordinator, Assistant Professor, Department of Pharmacy Practice, Teerthanker Mahaveer College of Pharmacy, TMU, Moradabad, Uttar Pradesh, India. Email: [sarita28787@gmail.com](mailto:sarita28787@gmail.com)
4. Pharm D Intern Student, Department of Pharmacy Practice, Teerthanker Mahaveer College of Pharmacy, TMU, Moradabad, Uttar Pradesh, India. Email: [sreelakshmi_710@yahoo.in](mailto:sreelakshmi_710@yahoo.in)
5. Pharm D Intern Student, Department of Pharmacy Practice, Teerthanker Mahaveer College of Pharmacy, TMU, Moradabad, Uttar Pradesh, India. Email: [nancygoel1254@gmail.com](mailto:nancygoel1254@gmail.com)
6. Pharm D Intern Student, Department of Pharmacy Practice, Teerthanker Mahaveer College of Pharmacy, TMU, Moradabad, Uttar Pradesh, India. Email: aashijain979@gmail.com
7. Pharm D Intern Student, Department of Pharmacy Practice, Teerthanker Mahaveer College of Pharmacy, TMU, Moradabad, Uttar Pradesh, India. Email: [besty.thomas94@gmail.com](mailto:besty.thomas94@gmail.com)
8. Pharm D Intern Student, Department of Pharmacy Practice, Teerthanker Mahaveer College of Pharmacy, TMU, Moradabad, Uttar Pradesh, India. Email: [kulsoomhamid6@gmail.com](mailto:kulsoomhamid6@gmail.com)
9. Pharm D Intern Student, Department of Pharmacy Practice, Teerthanker Mahaveer College of Pharmacy, TMU, Moradabad, Uttar Pradesh, India. Email: [chauhan.rash1994@gmail.com](mailto:chauhan.rash1994@gmail.com)

***Corresponding author:**

Amrita Kumari

Mobile no: 919058740535

Email: [amritakm2504@gmail.com](mailto:amritakm2504@gmail.com)
